# Supplementary material for: Analysis of the genetic basis of periodic fever with aphthous stomatitis, pharyngitis, and cervical adenitis (PFAPA) syndrome
Source: PubMed Central journal article supplement (PMC4437314; doi:10.1038/srep10200), 2015-05-19
Supplement: srep10200-s1.pdf [file srep10200-s1.pdf]

# Analysis of the genetic basis of periodic fever with aphthous stomatitis, pharyngitis, and cervical adenitis (PFAPA) syndrome

Silvio Alessandro Di Gioia,<sup>1</sup> Nicola Bedoni,<sup>1</sup> Annette von Scheven-Gête,<sup>2</sup> Federica Vanoni,<sup>2</sup> Andrea Superti-Furga,<sup>3</sup> Michaël Hofer,<sup>2,4\*</sup> Carlo Rivolta<sup>1\*</sup>

<sup>1</sup>Department of Medical Genetics, University of Lausanne, 1005 Lausanne, Switzerland

<sup>2</sup>Pediatric Rheumatology Unit of Western Switzerland, Department of Pediatrics, CHUV, University Hospital of Lausanne, Lausanne

<sup>3</sup>Division of Molecular Pediatrics Department of Pediatrics, CHUV, University Hospital of Lausanne, Lausanne, Switzerland

<sup>4</sup>Department of Pediatrics, HUG, Geneva, Switzerland

\*Equally contributing authors

**Supplementary Table 1. List of genes present in the interval (hg17)**

| <b>Gene</b>         | <b>Function</b>                      | <b>Gene</b>      | <b>Function</b>             |
|---------------------|--------------------------------------|------------------|-----------------------------|
| <b>FAM84B</b>       | Unknown                              | <b>OC90</b>      | Subunit of otoconin         |
| <b>PCAT1</b>        | lncRNA                               | <b>HHLA1</b>     | Human endogenous retrovirus |
| <b>POU5F1B</b>      | Probably transcription factor        | <b>KCNQ3</b>     | Potassium channel subunit   |
| <b>LOC727677</b>    | lncRNA                               | <b>HPYR1</b>     | lncRNA                      |
| <b>MYC</b>          | Transcription factor                 | <b>LRRC6</b>     | Ciliary protein             |
| <b>MIR1204</b>      | miRNA                                | <b>TMEM71</b>    | Unknown                     |
| <b>PVT1</b>         | lncRNA                               | <b>PHF20L1</b>   | Unknown                     |
| <b>MIR1205</b>      | miRNA                                | <b>TG</b>        | thyroglobulin               |
| <b>MIR1206</b>      | miRNA                                | <b>SLA</b>       | Regulator of T cells        |
| <b>MIR1207</b>      | miRNA                                | <b>WISP1</b>     | lncRNA                      |
| <b>MIR1208</b>      | miRNA                                | <b>NDRG1</b>     | Mitotic spindle protein     |
| <b>LOC728724</b>    | lncRNA                               | <b>ST3GAL1</b>   | Glycosylating protein       |
| <b>GSDMC</b>        | Leucin zip. Not known                | <b>ZFAT</b>      | Transcription factor        |
| <b>FAM49B</b>       | Unknown                              | <b>ZFAT-AS1</b>  | lncRNA                      |
| <b>MIR5194</b>      | miRNA                                | <b>MIR30B</b>    | miRNA                       |
| <b>ASAP1</b>        | Membrane trafficking                 | <b>MIR30D</b>    | miRNA                       |
| <b>LOC100507117</b> | lncRNA                               | <b>LOC286094</b> | lncRNA                      |
| <b>ASAP1-IT1</b>    | lncRNA                               | <b>KHDRBS3</b>   | RNA binding protein         |
| <b>ADCY8</b>        | Adenylate cyclase brain specific     | <b>FAM135B</b>   | Unknown                     |
| <b>EFR3A</b>        | Membrane protein involved in hearing | <b>COL22A1</b>   | Collagen protein            |

**Analysis of the genetic basis of periodic fever with aphthous stomatitis, pharyngitis, and cervical adenitis (PFAPA) syndrome.** Silvio Alessandro Di Gioia, Nicola Bedoni, Annette von Scheven-Gête, Federica Vanoni, Andrea Superti-Furga, Michaël Hofer, Carlo Rivolta

**Supplementary Table 2. Relevant DNA changes on chromosome 8's critical region**

| Chromosome | Position  | Gene Region        | Gene Symbol         | Protein Variant     | Case Samples With Variant | L1_PFAPA - Read Depth | C1 - Read Depth | B1 - Read Depth | Translation Impact | SIFT Function Prediction | dbSNP ID  |
|------------|-----------|--------------------|---------------------|---------------------|---------------------------|-----------------------|-----------------|-----------------|--------------------|--------------------------|-----------|
| 8          | 131136174 | Intronic           | ASAP1               |                     | 1                         | 10                    |                 |                 |                    |                          |           |
| 8          | 131199667 | Intronic           | ASAP1               |                     | 1                         | 26                    |                 |                 |                    |                          | 374655037 |
| 8          | 131308755 | Intronic;<br>ncRNA | ASAP1;<br>ASAP1-IT1 |                     | 1                         |                       | 29              |                 |                    |                          |           |
| 8          | 131859791 | Intronic           | ADCY8               |                     | 1                         |                       |                 | 17              |                    |                          |           |
| 8          | 132952727 | Intronic           | EFR3A               |                     | 1                         | 84                    |                 |                 |                    |                          | 34080810  |
| 8          | 133023148 | 3'UTR              | EFR3A               |                     | 1                         |                       | 133             |                 |                    |                          |           |
| 8          | 133036718 | 3'UTR              | OC90                |                     | 1                         | 522                   |                 |                 |                    |                          | 11984482  |
| 8          | 133041571 | Intronic           | OC90                |                     | 1                         | 263                   |                 |                 |                    |                          | 187677649 |
| 8          | 133044122 | Intronic           | OC90                |                     | 1                         |                       | 65              |                 |                    |                          | 61756131  |
| 8          | 133062088 | Intronic           | OC90                |                     | 2                         | 476                   |                 | 12              |                    |                          | 140801563 |
| 8          | 133074915 | 3'UTR              | HHLA1               |                     | 1                         | 350                   |                 |                 |                    |                          | 184490995 |
| 8          | 133075629 | 3'UTR              | HHLA1               |                     | 1                         | 133                   |                 |                 |                    |                          | 189956458 |
| 8          | 133076330 | Intronic           | HHLA1               |                     | 1                         | 222                   |                 |                 |                    |                          | 185769537 |
| 8          | 133088451 | Intronic           | HHLA1               |                     | 1                         | 90                    |                 |                 |                    |                          | 80015412  |
| 8          | 133088536 | Intronic           | HHLA1               |                     | 1                         | 23                    |                 |                 |                    |                          | 117096489 |
| 8          | 133088610 | Intronic           | HHLA1               |                     | 1                         | 336                   |                 |                 |                    |                          | 79355606  |
| 8          | 133088884 | Intronic           | HHLA1               |                     | 1                         | 277                   |                 |                 |                    |                          | 190888827 |
| 8          | 133146616 | Exonic             | KCNQ3               | p.P454S;<br>p.P574S | 1                         |                       | 98              |                 | Missense           | Tolerated                | 74582884  |
| 8          | 133200104 | Intronic           | KCNQ3               |                     | 2                         | 34                    | 24              |                 |                    |                          | 112359919 |
| 8          | 133200108 | Intronic           | KCNQ3               |                     | 2                         | 32                    | 28              |                 |                    |                          | 113534923 |
| 8          | 133200146 | Intronic           | KCNQ3               |                     | 1                         | 13                    |                 |                 |                    |                          |           |
| 8          | 133200150 | Intronic           | KCNQ3               |                     | 1                         | 14                    |                 |                 |                    |                          |           |
| 8          | 133200173 | Intronic           | KCNQ3               |                     | 1                         | 12                    |                 |                 |                    |                          |           |

**Analysis of the genetic basis of periodic fever with aphthous stomatitis, pharyngitis, and cervical adenitis (PFAPA) syndrome.** Silvio Alessandro Di Gioia, Nicola Bedoni, Annette von Scheven-Gête, Federica Vanoni, Andrea Superti-Furga, Michaël Hofer, Carlo Rivolta

|   |           |          |         |          |     |     |     |          |           |
|---|-----------|----------|---------|----------|-----|-----|-----|----------|-----------|
| 8 | 133200175 | Intronic | KCNQ3   | 1        | 12  |     |     |          |           |
| 8 | 133686307 | Intronic | LRRC6   | 1        | 55  |     |     |          |           |
| 8 | 133686319 | Intronic | LRRC6   | 1        | 69  |     |     |          |           |
| 8 | 133686364 | Intronic | LRRC6   | 1        |     |     | 27  |          |           |
| 8 | 133723314 | Intronic | TMEM71  | 1        |     | 107 |     |          | 139614933 |
| 8 | 133723332 | Intronic | TMEM71  | 1        |     |     | 53  |          |           |
| 8 | 133860996 | 3'UTR    | PHF20L1 | 3        | 401 | 128 | 152 |          | 200187079 |
| 8 | 133984821 | Intronic | TG      | 3        | 165 | 26  | 57  |          | 1554541   |
| 8 | 134052225 | Intronic | TG; SLA | 1        | 211 |     |     |          | 940080    |
| 8 | 134468274 | 3'UTR    | ST3GAL1 | 1        | 301 |     |     |          | 78468413  |
| 8 | 135602612 | Intronic | ZFAT    | 1        | 50  |     |     |          | 141077144 |
| 8 | 135610971 | Intronic | ZFAT    | 1        | 145 |     |     |          | 117672909 |
| 8 | 139143039 | 3'UTR    | FAM135B | 1        |     | 109 |     |          |           |
| 8 | 139218528 | Intronic | FAM135B | 2        | 27  | 23  |     |          | 62530917  |
| 8 | 139219088 | Intronic | FAM135B | 1        | 15  |     |     |          | 147191196 |
| 8 | 139380024 | Intronic | FAM135B | 1        | 125 |     |     |          | 143041039 |
| 8 | 139601612 | Exonic   | COL22A1 | p.P1589T | 1   | 310 |     | Missense | Tolerated |
| 8 | 139631866 | Intronic | COL22A1 |          | 1   | 376 |     |          | 144729639 |
| 8 | 139668024 | Intronic | COL22A1 |          | 1   | 261 |     |          | 117016826 |
| 8 | 139696503 | Intronic | COL22A1 |          | 1   |     | 24  |          | 5895552   |
| 8 | 139704646 | Intronic | COL22A1 |          | 1   | 11  |     |          | 62527926  |
| 8 | 139704651 | Intronic | COL22A1 |          | 1   | 11  |     |          | 62527927  |
| 8 | 139704653 | Intronic | COL22A1 |          | 1   | 11  |     |          | 62527928  |
| 8 | 139733184 | Intronic | COL22A1 |          | 1   | 225 |     |          | 76691367  |
| 8 | 139774852 | Intronic | COL22A1 |          | 1   | 19  |     |          |           |
| 8 | 139817576 | Intronic | COL22A1 |          | 1   | 29  |     |          | 371321111 |

**Analysis of the genetic basis of periodic fever with aphthous stomatitis, pharyngitis, and cervical adenitis (PFAPA) syndrome.** Silvio Alessandro Di Gioia, Nicola Bedoni, Annette von Scheven-Gête, Federica Vanoni, Andrea Superti-Furga, Michaël Hofer, Carlo Rivolta

### Supplementary Table 3. Variants present in autoinflammatory and inflammasome related genes, per family

| FAMILY A |           |                |                  |       |     |     |           |                   |
|----------|-----------|----------------|------------------|-------|-----|-----|-----------|-------------------|
| Gene     | rs number | NT change      | AA change        | MAF   | A1  | A2  | SIFT      | Polyphen          |
| MEFV     | 11466045  | c.442G>C       | p.E148Q          | 0.007 | +/- | +/- | Damaging  | Probably damaging |
| NLRP3    | 35829419  | c.2113C>A      | p.Q705K          | 0.04  | +/- | +/- | Tolerated | Benign            |
| CARD8    | 2043211   | c.304T>A       | p.F52I           | 0.3   | +/- | +/- | Damaging  | Damaging          |
|          | 140826611 | c.440_441dupAA | p.Val148LysfsX26 | 0.04  | +/+ | +/- | Damaging  | Damaging          |
| FAMILY B |           |                |                  |       |     |     |           |                   |
| Gene     | rs number | NT change      | AA change        | MAF   | B1  | B7  | SIFT      | Polyphen          |
| TNFRSF1A | 4149584   | c.362G>A       | p.R121Q          | 0.018 | +/- | +/- | Tolerated | Probably damaging |
| TNFRSF8  | 2230624   | c.818G>A       | p.C273Y          | 0.013 | +/- | +/- | Damaging  | Probably damaging |
| CARD8    | 2043211   | c.304T>A       | p.F52I           | 0.3   | +/- | +/- | Damaging  | Damaging          |
| NLRP2    | novel     | c.1511G>A      | p.G504D          | -     | +/+ | +/- | Tolerated | Probably damaging |
| NAIP     | 61757629  | c.481G>A       | p.A161T          | 0.03  | +/+ | +/- | Tolerated | Probably damaging |
| NOD1     | 150153921 | c.577C>G       | p.L193V          | 0.007 | +/+ | +/- | Damaging  | Probably damaging |
| FAMILY O |           |                |                  |       |     |     |           |                   |
| Gene     | rs number | NT change      | AA change        | MAF   | O1  | O5  | SIFT      | Polyphen          |
| NLRP4    | 117212164 | c.485C>T       | p.T162M          | 0.036 | +/- | +/- | Damaging  | Damaging          |
| NLRP10   | 150112481 | c.1151T>C      | p.I384T          | 0     | +/- | +/+ | Damaging  | Damaging          |
| NOD5     | 145779362 | c.1639C>T      | p.R547W          | 0.007 | +/- | +/- | Damaging  | Probably damaging |
| NLRP3    | 121908147 | c.592G>A       | p.V200M          | 0.007 | +/+ | +/- | Tolerated | Benign            |

**Analysis of the genetic basis of periodic fever with aphthous stomatitis, pharyngitis, and cervical adenitis (PFAPA) syndrome.** Silvio Alessandro Di Gioia, Nicola Bedoni, Annette von Scheven-Gête, Federica Vanoni, Andrea Superti-Furga, Michaël Hofer, Carlo Rivolta

**FAMILY R**

| Gene          | rs number | NT change               | AA change | MAF    | R1  | R2  | SIFT      | Polyphen          |
|---------------|-----------|-------------------------|-----------|--------|-----|-----|-----------|-------------------|
| <b>NLRP12</b> | NOVEL     |                         | p.R211C   | .      | +/- | +/- | Damaging  | Damaging          |
| <b>MEFV</b>   | 104895169 | c.1274A>T; c.1760-28T>A | p.F425Y   | 0.0012 | +/- | +/+ | Tolerated | Probably damaging |
| <b>LPIN3</b>  | NOVEL     | c.1168G>T               | p.D390Y   | .      | +/- | +/+ | Damaging  | Probably damaging |
|               | 201671223 | c.1807C>T               | p.R603C   | 0.001  | +/- | +/- | Tolerated | Bening            |

**Patient F**

| Gene         | rs number | NT change | AA change | MAF   | F1  | SIFT      | Polyphen |
|--------------|-----------|-----------|-----------|-------|-----|-----------|----------|
| <b>NLRP5</b> | NOVEL     | c.764A>G  | p.N255S   | -     | +/- | Tolerated | Benign   |
| <b>NOD4</b>  | 16965150  | c.629C>T  | p.S210L   | 0.03  | +/- | Tolerated | Benign   |
| <b>NWD1</b>  | 149694092 | c.917C>T  | p.S305L   | 0.007 | +/- | Tolerated | Benign   |

**Patient 2940**

| Gene          | rs number | NT change | AA change | MAF   | 2940 | SIFT      | Polyphen |
|---------------|-----------|-----------|-----------|-------|------|-----------|----------|
| <b>NLRP2</b>  | 182098487 | c.1889T>C | p.L608P   | 0.005 | +/-  | Damag.    | Damaging |
| <b>NLRP5</b>  | NOVEL     | c.821G>A  | p.R274Q   | .     | +/-  | Activate  | Benign   |
| <b>NLRP11</b> | 11671248  | c.3074C>T | p.S1025L  | 0.01  | +/-  | Damag.    | Benign   |
| <b>NOD3</b>   | NOVEL     | c.3014G>A | p.R1005Q  | .     | +/-  | Tolerated | -        |

**Patient 2941**

| Gene         | rs number | NT change | AA change | MAF   | 2941 | SIFT      | Polyphen          |
|--------------|-----------|-----------|-----------|-------|------|-----------|-------------------|
| <b>IPAF</b>  | 149451729 | c.2357G>T | p.G786V   | 0.004 | +/-  | Tolerated | Possibly damaging |
| <b>NOD4</b>  | 16965150  | c.629C>T  | p.S210L   | 0.03  | +/-  | Tolerated | Benign            |
| <b>NLRP1</b> | 35596958  | c.3265A>G | p.M1089V  | 0.05  | +/-  | Activate  | Benign            |
|              | 34733791  | c.2994C>T | p.T965I   | 0.05  | +/-  | Tolerated | Benign            |
|              | 11657747  | c.2633C>T | p.T878M   | 0.05  | +/-  | Tolerated | Benign            |

**Analysis of the genetic basis of periodic fever with aphthous stomatitis, pharyngitis, and cervical adenitis (PFAPA) syndrome.** Silvio Alessandro Di Gioia, Nicola Bedoni, Annette von Scheven-Gête, Federica Vanoni, Andrea Superti-Furga, Michaël Hofer, Carlo Rivolta

|              |           |                |                  |      |     |           |          |
|--------------|-----------|----------------|------------------|------|-----|-----------|----------|
|              | 52795654  | c.2345C>G      | p.T782S          | 0.05 | +/- | Tolerated | Benign   |
|              | 11651595  | c.737C>G       | p.T246S          | 0.05 | +/- | Tolerated | Benign   |
| <b>CARD8</b> | 140826611 | c.440_441dupAA | p.Val148LysfsX26 | 0.04 | +/+ | Damag.    | Damaging |

**Patient 2942**

| Gene         | rs number | NT change      | AA change        | MAF  | 2942 | SIFT      | Polyphen          |
|--------------|-----------|----------------|------------------|------|------|-----------|-------------------|
| <b>NLRP1</b> | 61754791  | c.2815G>A      | p.V939M          | 0.02 | +/-  | Tolerated | Possibly damaging |
| <b>NLRP2</b> | 142463014 | c.11C>T        | p.S4L            | 0.01 | +    |           |                   |
| <b>NOD1</b>  | NOVEL     | c.721T>G       | p.C241G          | .    | +/-  | Tolerated | Benign            |
| <b>CARD8</b> | 140826611 | c.440_441dupAA | p.Val148LysfsX26 | 0.04 | +/+  | Damag.    | Damaging          |

**Analysis of the genetic basis of periodic fever with aphthous stomatitis, pharyngitis, and cervical adenitis (PFAPA) syndrome.** Silvio Alessandro Di Gioia, Nicola Bedoni, Annette von Scheven-Gête, Federica Vanoni, Andrea Superti-Furga, Michaël Hofer, Carlo Rivolta
